# Supplementary material for: Influence of beamlet width on dynamic IMRT plan quality in nasopharyngeal carcinoma
Source: PeerJ. 2022 Aug 5;10:e13748. doi: 10.7717/peerj.13748 (PMC9359131; doi:10.7717/peerj.13748)
Supplement: Supplemental Information 1 [file peerj-10-13748-s001.xlsx]

## Sheet: TC
	PTVnx					PTVnd					PTV1					PTV2
Patient	TC-02	TC-04	TC-06	TC-08	TC-10	TC-02	TC-04	TC-06	TC-08	TC-10	TC-02	TC-04	TC-06	TC-08	TC-10	TC-02	TC-04	TC-06	TC-08	TC-10
p1	98.59	98.38	97.92	97.73	98.41	99.9	99.06	97.59	98.45	98.08	98.82	97.89	97.93	97.42	97.48	98.89	97.74	97.31	96.92	96.66
p2	95.26	95.29	95.18	95.49	95.56	97.94	97.11	98.81	98.11	97.93	96.63	96.73	96.62	96.9	96.76	95.94	95.97	95.6	95.93	97.68
p3	99.31	99.36	98.93	98.56	98.57	99.93	99.98	97.98	97.77	97.61	99.29	99.26	97.84	98.02	97.55	99.04	98.93	97.67	97.22	96.83
p4	98.55	98.82	99.08	98.37	97.94	97.85	98.16	97.49	98.27	96.52	97.28	97.38	97.36	97.05	96.99	98.16	98.23	98.28	97.98	97.5
p5	97.82	98	98.08	97.71	97.51	95.98	96.41	95.93	95.74	95.25	98.49	98.56	98.03	97.94	96.08	97.32	97.65	97.35	96.96	97.08
p6	98.23	98.38	98.16	98.06	98.01	98.94	97.72	98.24	96.67	97.13	97.28	97.43	97.22	97.14	97.06	97.58	97.94	97.42	97.58	97.38
p7	98.4	98.07	98.25	97.76	98.06	97.5	97.39	97.63	96.74	95.69	97.91	98.3	98.05	97.94	97.83	97.8	98.01	97.95	97.26	97.03
p8	98.49	98.98	98.35	97.63	96.87	96.8	98.58	96.66	96.32	95.28	98.13	99.01	98.26	97.9	97.92	99.51	99.89	99.38	98.93	97.75
p9	96.81	97.07	96.51	96.35	96.31	97.37	97.31	97.87	97.84	96.43	97.96	98.32	98.14	97.73	97.78	97.38	98.24	97.86	97.03	96.49
p10	97.67	97.86	97.61	97.43	96.8	98.07	97.38	97.94	97.86	96.39	98.51	98.36	98.35	98.29	98.2	97.47	97.15	97.68	97.22	96.94
p11	98.93	98.8	98.98	98.53	98.33	97.52	98.99	96.78	97.9	97.43	98.14	97.95	98.14	98.03	97.86	97.83	97.63	97.6	97.54	97.35
p12	98.61	98.5	98.4	98.03	98.34	98.44	96.87	97.86	97.63	97.1	98.29	98.28	98.03	97.86	97.68	96.94	96.85	96.61	96.59	98.05
p13	100	99.96	99.51	98.99	98.47	99.7	99.89	98.44	98.04	96.98	99.99	99.95	99.83	98.93	98.3	99.91	99.83	99.57	98.83	97.56
p14	98.54	98.03	98.23	98.32	97.63	97.99	97.66	97.59	97.51	96.78	98.06	98.31	98.09	98.21	98.06	97.72	98.28	97.7	97.13	96.79
p15	98.62	98.39	98.55	97.73	97.68	99.86	99.64	99.65	99.24	98.12	99.14	98.49	98.48	98.23	97.79	99.12	98.13	98.22	97.62	96.82
p16	95.61	96.21	95.71	95.29	95.06	96.75	96.86	96.81	96.23	96.18	97.16	97.36	97.16	96.97	96.8	97.2	97.4	97.2	96.99	96.93
p17	97.99	98.41	97.82	97.44	97.41	97.5	97.63	97.69	96.83	96.55	98.26	98.47	98.18	98.32	98.28	97.44	98.2	97.47	97.73	97.25
p18	98.9	99.37	98.74	99.09	98.43	99.77	100	99.52	98.15	98.36	98.77	99.45	98.89	98.59	98.5	99.48	99.72	98.75	98.09	97.25
p19	96.26	96.87	96.12	95.75	95.78	98.31	99.62	97.6	97.14	97.27	97.21	97.47	96.96	96.81	97.27	96.74	97.85	96.81	96.35	96.55
p20	98.27	98.42	98.27	97.8	98.91	98.9	99.96	98.27	97.4	98.05	99.19	99.11	98.51	98.48	97.64	98.66	99.45	98.67	98.14	97.22
	98.043	98.1585	97.92	97.603	97.504	98.251	98.311	97.8175	97.492	96.9565	98.2255	98.304	98.0035	97.838	97.5915	98.0065	98.1545	97.755	97.402	97.1555

## Sheet: HI
HI-02	HI-04	HI-06	HI-08	HI-10	HI-02	HI-04	HI-06	HI-08	HI-10	HI-02	HI-04	HI-06	HI-08	HI-10	HI-02	HI-04	HI-06	HI-08	HI-10
0.0577	0.0576957	0.0623516	0.063519	0.0579095	0.0605165	0.0673641	0.0737086	0.0702764	0.0749929	0.138521	0.144036	0.144792	0.147825	0.145786	0.259101	0.276414	0.281142	0.288499	0.286278
0.138225	0.133034	0.14151	0.13902	0.127281	0.0736822	0.0786698	0.0719127	0.0715622	0.077268	0.186083	0.180713	0.188456	0.19443	0.210207	0.324821	0.319712	0.32503	0.345429	0.349454
0.0527902	0.0533561	0.0543135	0.0561818	0.0644786	0.0517521	0.0601019	0.0741285	0.074803	0.075899	0.133972	0.135651	0.143003	0.142429	0.152545	0.257385	0.262387	0.278652	0.28431	0.292293
0.0569873	0.05581	0.0562488	0.0663888	0.0720949	0.0772905	0.07266	0.0785014	0.0743322	0.0917474	0.160059	0.155475	0.157644	0.174894	0.179212	0.279783	0.280755	0.280532	0.289389	0.298774
0.0619278	0.0629078	0.0644153	0.0693594	0.0769852	0.102911	0.102096	0.10653	0.104268	0.11455	0.141586	0.142707	0.147865	0.150656	0.153617	0.278918	0.277684	0.283246	0.28842	0.293732
0.0602079	0.0626944	0.0655724	0.0697983	0.0743683	0.0648893	0.0778431	0.0711558	0.0900472	0.08591	0.157329	0.156933	0.161481	0.165693	0.172608	0.282107	0.278932	0.286295	0.288329	0.29592
0.0580949	0.0591766	0.0629046	0.0750048	0.0667142	0.0801713	0.0781811	0.0783358	0.0847937	0.100486	0.143259	0.142235	0.145756	0.155059	0.150263	0.276583	0.275156	0.277722	0.291456	0.292822
0.0575295	0.0541926	0.0592462	0.0709877	0.0776808	0.0838075	0.0652687	0.0863986	0.0944932	0.114876	0.140298	0.127479	0.139574	0.151524	0.152499	0.243511	0.223928	0.249981	0.261068	0.278485
0.0762211	0.0724648	0.0840663	0.0923544	0.0915379	0.0797306	0.0792765	0.0765784	0.0761319	0.0876651	0.145191	0.142613	0.146141	0.154694	0.154968	0.284539	0.275737	0.281588	0.296917	0.312081
0.065764	0.0626743	0.0700221	0.0760853	0.0839574	0.0752698	0.0773767	0.0762863	0.0760623	0.0915167	0.141602	0.140902	0.146872	0.151953	0.154262	0.287369	0.288444	0.287627	0.298072	0.307722
0.055483	0.0565669	0.0587718	0.0643553	0.0686815	0.0783053	0.0707721	0.08005	0.0737958	0.0803807	0.141593	0.143511	0.145461	0.147931	0.152289	0.278025	0.278685	0.281876	0.282591	0.288323
0.056875	0.0575419	0.0650768	0.0720484	0.070784	0.0736057	0.0818482	0.0755264	0.0776957	0.0821623	0.140955	0.140996	0.148565	0.154277	0.157741	0.291234	0.291431	0.297107	0.300587	0.313227
0.0460985	0.0472878	0.0524822	0.0573269	0.0578852	0.0667533	0.0618591	0.0753978	0.0731396	0.0841018	0.115929	0.116764	0.12184	0.134126	0.139576	0.23581	0.243185	0.252873	0.26763	0.280406
0.0571566	0.0628433	0.0636992	0.0653678	0.0695508	0.0744665	0.0754691	0.0762287	0.0777262	0.0840404	0.141717	0.141387	0.145386	0.145904	0.14824	0.276959	0.270868	0.280143	0.287625	0.294573
0.0576412	0.0588316	0.0587379	0.0697515	0.0714921	0.0551604	0.0634064	0.0631862	0.066145	0.0743466	0.12684	0.13861	0.14043	0.144978	0.152291	0.25	0.268258	0.267372	0.276254	0.290836
0.118333	0.0992644	0.113854	0.124078	0.133097	0.0822874	0.0801758	0.0848953	0.0911145	0.0901338	0.174286	0.168258	0.17461	0.182232	0.189278	0.29231	0.28879	0.292676	0.297317	0.299355
0.0623816	0.0604273	0.0652138	0.0757097	0.0760806	0.0754762	0.0775408	0.077064	0.0829534	0.0859789	0.142365	0.141678	0.145042	0.149517	0.150271	0.281202	0.275653	0.282148	0.285826	0.292767
0.0577564	0.0542343	0.0568516	0.0545432	0.0578951	0.0567389	0.0562479	0.0629204	0.0711778	0.070486	0.140552	0.135623	0.138073	0.139601	0.140395	0.252673	0.246621	0.26557	0.273826	0.282763
0.0987199	0.0785479	0.104947	0.118966	0.118597	0.0680396	0.0587493	0.0741804	0.0769312	0.0764256	0.165771	0.15658	0.174717	0.185274	0.0738625	0.29586	0.282573	0.296938	0.305313	0.189862
0.0590733	0.0574894	0.0614463	0.069179	0.0592313	0.0628372	0.0572969	0.0720352	0.0769289	0.076007	0.13789	0.139381	0.144843	0.148012	0.152243	0.261742	0.24221	0.260223	0.271763	0.279257

## Sheet: CI
PTVNX	PTVNX	PTVNX	PTVNX	PTVNX	PTVND	PTVND	PTVND	PTVND	PTVND	PTV1	PTV2	PTV3	PTV4	PTV5	PTV2	PTV3	PTV4	PTV5	PTV6
BL-02	BL-04	BL-06	BL-08	BL-10	BL-02	BL-04	BL-06	BL-08	BL-10	BL-02	BL-04	BL-06	BL-08	BL-10	BL-02	BL-04	BL-06	BL-08	BL-10
0.56	0.6	0.58	0.57	0.56	0.15	0.16	0.15	0.15	0.15	0.39	0.42	0.41	0.41	0.39	0.75	0.78	0.76	0.77	0.75
0.63	0.63	0.63	0.6	0.59	0.07	0.07	0.08	0.07	0.07	0.54	0.57	0.56	0.53	0.48	0.79	0.79	0.79	0.78	0.76
0.59	0.6	0.6	0.63	0.57	0.12	0.12	0.12	0.12	0.11	0.43	0.46	0.46	0.47	0.46	0.76	0.77	0.78	0.78	0.78
0.65	0.65	0.64	0.62	0.62	0.07	0.07	0.06	0.06	0.06	0.55	0.58	0.57	0.56	0.06	0.74	0.76	0.75	0.74	0.7
0.54	0.54	0.55	0.53	0.51	0.21	0.21	0.2	0.2	0.19	0.44	0.44	0.43	0.43	0.42	0.81	0.82	0.8	0.8	0.79
0.64	0.63	0.62	0.59	0.57	0.05	0.05	0.05	0.05	0.05	0.58	0.58	0.57	0.58	0.65	0.72	0.73	0.72	0.72	0.7
0.62	0.64	0.62	0.6	0.61	0.1	0.2	0.2	0.1	0.1	0.42	0.43	0.42	0.43	0.42	0.76	0.78	0.77	0.77	0.75
0.67	0.64	0.68	0.67	0.67	0.11	0.11	0.11	0.11	0.11	0.52	0.51	0.53	0.52	0.51	0.61	0.6	0.61	0.61	0.59
0.65	0.67	0.64	0.62	0.59	0.19	0.19	0.19	0.18	0.18	0.42	0.43	0.42	0.42	0.41	0.71	0.74	0.71	0.73	0.7
0.67	0.68	0.68	0.66	0.63	0.13	0.13	0.13	0.13	0.12	0.51	0.51	0.51	0.51	0.49	0.83	0.83	0.83	0.83	0.81
0.58	0.6	0.59	0.58	0.55	0.23	0.23	0.23	0.22	0.22	0.43	0.43	0.43	0.42	0.4	0.78	0.79	0.78	0.78	0.77
0.69	0.69	0.68	0.68	0.66	0.16	0.16	0.16	0.16	0.15	0.51	0.52	0.51	0.49	0.48	0.86	0.87	0.86	0.85	0.85
0.57	0.58	0.63	0.65	0.65	0.02	0.02	0.02	0.02	0.02	0.41	0.42	0.45	0.44	0.44	0.73	0.75	0.77	0.79	0.78
0.67	0.66	0.67	0.66	0.65	0.22	0.22	0.22	0.22	0.21	0.38	0.38	0.38	0.38	0.38	0.8	0.79	0.79	0.78	0.78
0.52	0.54	0.57	0.5	0.5	0.28	0.3	0.3	0.29	0.28	0.65	0.67	0.67	0.66	0.65	0.81	0.83	0.81	0.82	0.8
0.63	0.6	0.64	0.64	0.62	0.18	0.19	0.18	0.18	0.18	0.41	0.42	0.4	0.4	0.4	0.75	0.78	0.76	0.74	0.73
0.6	0.61	0.61	0.59	0.57	0.26	0.26	0.26	0.26	0.26	0.37	0.38	0.37	0.37	0.37	0.79	0.81	0.8	0.79	0.78
0.68	0.64	0.67	0.66	0.64	0.19	0.18	0.19	0.18	0.18	0.45	0.43	0.45	0.45	0.45	0.76	0.76	0.79	0.79	0.77
0.63	0.65	0.64	0.61	0.6	0.06	0.06	0.06	0.06	0.06	0.56	0.54	0.54	0.5	0.52	0.78	0.78	0.77	0.76	0.78
0.58	0.55	0.52	0.5	0.5	0.09	0.09	0.09	0.08	0.08	0.46	0.46	0.48	0.49	0.46	0.72	0.73	0.72	0.74	0.72

## Sheet: D2%
	PTVnx	PTVnx	PTVnx	PTVnx	PTVnx	PTVnd	PTVnd	PTVnd	PTVnd	PTVnd	PTV1	PTV1	PTV1	PTV1	PTV1	PTV2	PTV2	PTV2	PTV2	PTV2
Patient	D2-02	D2-04	D2-06	D2-08	D2-10	D50-02	D50-04	D50-06	D50-08	D50-10	D2-02	D2-04	D2-06	D2-08	D2-10	D50-02	D50-04	D50-06	D50-08	D50-10
p1	7444.3	7437.4	7450.5	7454.3	7436.9	7277.3	7281.3	7284.5	7298.6	7278.6	7101	7082.1	7075.2	7084	7103.4	7414.9	7412.3	7419	7423.7	7410.8
p2	7569.4	7536	7572.4	7690.3	7711.3	7336.6	7332.7	7337.3	7375.9	7382.1	7088.2	7095.5	7111.5	7085.4	7112.9	7537.3	7507.6	7542.5	7661.6	7673.9
p3	7426.7	7435	7427.1	7429.4	7492.7	7266.5	7271.9	7272.6	7283.5	7300.1	7084.6	7113.4	7093.5	7091.4	7091.9	7397.6	7407.5	7398.2	7403.1	7459
p4	7444.2	7437.2	7448.1	7501.2	7523.7	7349	7271.1	7276.6	7293.4	7300.1	7108.9	7092.5	7097.9	7107.7	7106.4	7425.5	7418.2	7425.2	7475.8	7494.5
p5	7443.9	7458.8	7473.2	7496.1	7538.7	7285.9	7294.8	7296.4	7301.1	7310.5	7195.3	7211.1	7199.9	7186.1	7186	7407.3	7418.6	7429.6	7446.8	7477.8
p6	7448.2	7472.8	7484.4	7511.7	7544.4	7283.1	7298.9	7292.7	7299.6	7313.6	7075	7109	7084.1	7111.3	7096.6	7412.5	7435.1	7437.9	7464.9	7492.2
p7	7436.7	7433.5	7467	7538.3	7489.2	7274.3	7279.9	7292	7310.2	7287.8	7103.1	7096.3	7103.3	7100.2	7106.7	7412.6	7411.1	7438.1	7498.2	7453.5
p8	7439.3	7432.6	7446.9	7500.8	7516.6	7278	7255.6	7278.1	7290	7299.1	7096.5	7101.8	7091.4	7093.9	7110.2	7418.3	7412.9	7428.2	7478.1	7485.2
p9	7461.9	7468.7	7484.9	7518.7	7521.5	7286.7	7293.2	7299	7315.3	7315	7106.2	7103.5	7105.7	7101.8	7111.1	7442.1	7449.1	7463	7496.6	7500.7
p10	7462.8	7450.1	7494.1	7527.8	7544.4	7289.7	7277.3	7297.7	7308.9	7331.1	7104.7	7093.3	7106.6	7101.8	7112.6	7436.3	7426.4	7467.3	7500.9	7520.8
p11	7438.1	7442.6	7467.5	7489.2	7514.3	7276.1	7267.5	7279	7283	7296	7104.3	7105.5	7090	7088	7110.9	7411	7412.8	7437.4	7449.9	7473.4
p12	7439.3	7437.6	7487.5	7526.9	7530.4	7275.6	7274.7	7283.7	7295.1	7302.5	7106.7	7107.9	7098.7	7105.8	7115	7411.8	7411.4	7451.7	7482.4	7489.5
p13	7446.4	7442.6	7437.1	7451	7441.3	7277.9	7274.6	7259.6	7279.3	7278.2	7103.1	7067.2	7114.7	7088.4	7115.5	7420.3	7415	7410.4	7424.9	7410.3
p14	7437.5	7458.8	7472.4	7487.8	7493.5	7269.5	7283.2	7281.1	7283.4	7276.7	7096.3	7092.1	7093.7	7095.5	7105.5	7419	7437.1	7449.8	7464.3	7466.6
p15	7443.9	7444.1	7453.4	7497.9	7507	7269.1	7278.4	7279.8	7300.2	7309.9	7099	7093	7084.2	7113	7106.9	7371.6	7387.6	7393.5	7419.9	7435.1
p16	7519.3	7517.2	7511.4	7514.5	7538.2	7329.3	7313.8	7320.8	7318	7330	7106.6	7086.2	7100.9	7103.1	7106.8	7501.6	7496.8	7490.8	7493.7	7516.1
p17	7454.3	7459.2	7467.6	7520.4	7521.6	7287.4	7288.1	7296	7316.1	7304.1	7083.1	7103	7102.1	7108	7109.7	7434	7442.7	7449.9	7495	7498.8
p18	7444	7451	7439.1	7431.8	7435	7259.8	7274	7269.8	7276.8	7273.5	7054.1	7103.8	7079.7	7078.7	7083.2	7407.4	7410.6	7401.7	7401.9	7401.4
p19	7466.4	7449.9	7491.4	7523.6	7528.9	7296.4	7286	7298.9	7320.6	7315.5	7066.7	7084.8	7082.1	7087.6	7084.6	7435.6	7421.6	7455.2	7487.4	7084.6
p20	7442.4	7434.3	7458.9	7495	7469.5	7301.1	7297	7277.9	7299.9	7300.2	7043.3	7081.2	7090.9	7092.6	7110.4	7393.3	7397.3	7411.5	7436.8	7427.2
